# Supplementary material for: Developing a Web-Based Geolocated Directory of HIV Pre-Exposure Prophylaxis-Providing Clinics: The PrEP Locator Protocol and Operating Procedures
Source: PubMed Central journal article supplement (PMC5607436; doi:10.2196/publichealth.7902), 2017-09-06
Supplement: publichealth_v3i3e58_app2.pdf [file publichealth_v3i3e58_app2.pdf]

## Multimedia Appendix 2: Clinic addition webform

To add a site to the Locator, please fill out as much of the form as you can.

I am:  An employee or provider at this clinic  Not a clinic employee

Please provide your contact information so we can verify the clinic information submitted.

My name  My email

Clinic, practice, or provider name\*

Website

Email

Status\*

Street Address\*

Street Address 2

County or City\*  State\*  Zip Code\*

Main Phone\*  Ext.

Secondary Phone  Ext.

Hours of Operation:  Mon:  9:00AM  to  5:00PM   
 Tue:  9:00AM  to  5:00PM   
 Wed:  9:00AM  to  5:00PM   
 Thu:  9:00AM  to  5:00PM   
 Fri:  9:00AM  to  5:00PM   
 Sat:  9:00AM  to  5:00PM   
 Sun:  9:00AM  to  5:00PM

Do you have Spanish speaking clinic staff?  Yes  No / Don't know

Does your practice help patients navigate paying for PrEP (e.g. reviewing insurance, indentifying coverage/deductable gaps, and assisting with enrollment in appropriate programs)?

Yes  No / Don't know

Do you offer PrEP if a patient does not have insurance?

Yes  No / Don't know

Do you have a PrEP coordinator in your clinic or practice?

Yes  No / Don't know

If you are willing, please provide:

PrEP Coordinator Name

PrEP Coordinator Phone  Ext.

Please provide a clinic contact email. This email will only be used twice a year to confirm current clinic information. It will not be shared or made public.

Contact Email

**SUBMIT**

\*Required information
