# Supplementary material for: Developing a Web-Based Geolocated Directory of HIV Pre-Exposure Prophylaxis-Providing Clinics: The PrEP Locator Protocol and Operating Procedures
Source: PubMed Central journal article supplement (PMC5607436; doi:10.2196/publichealth.7902), 2017-09-06
Supplement: publichealth_v3i3e58_app3.pdf [file publichealth_v3i3e58_app3.pdf]

# Multimedia Appendix 3: Desktop widget interface

## PrEP Locator Find Your Provider

- About Us
- Locator Data
- FAQ
- Add Provider
- Add Locator To Your Site
- Contact

Atlanta

PrEP for uninsured

PrEP access assistance

**Aldredge Health Center Fulton County Department of Health and Wellness**  
99 Jesse Hill Jr. Dr. SE  
Atlanta, GA 30303  
404-613-4708  
**Distance from your location: 0.4 miles**

**Empowerment Resource Center**  
100 Edgewood Ave Ste 1025  
Atlanta, GA 30303  
404-526-1145  
**Distance from your location: 0.4 miles**

**Atlanta Medical Center**  
285 Blvd NE  
Suite 140  
Atlanta, GA 30312  
404-265-1044  
**Distance from your location: 0.9 miles**

**Dr. T. Douglas Gurley**  
659 Auburn Ave NE  
#156  
Atlanta, GA 30312  
404-888-0228  
**Distance from your location: 1.3 miles**

**Infectious Disease of Atlanta, LLC**  
735 Piedmont Ave. NE  
Atlanta, GA 30309  
404-588-4680  
**Distance from your location: 1.8 miles**

[Add PrEP Locator to Your Site](#)

[Suggest a provider for the directory](#)

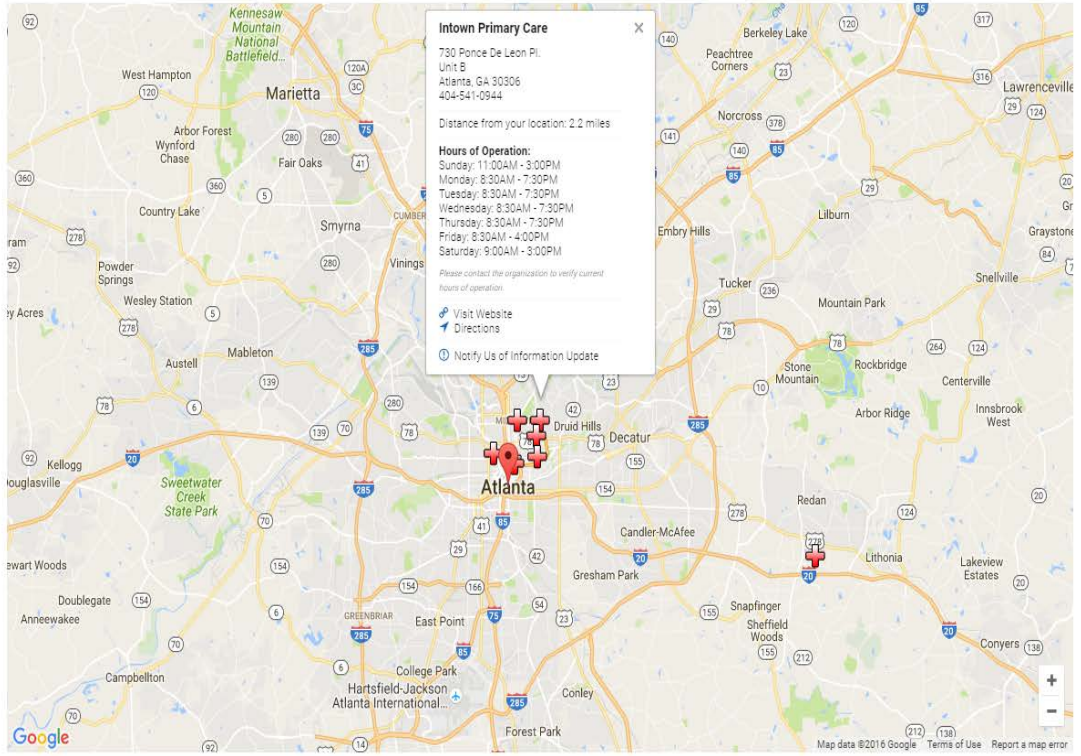

**Intown Primary Care**

730 Ponce De Leon Pl.  
Unit B  
Atlanta, GA 30306  
404-541-0944

Distance from your location: 2.2 miles

**Hours of Operation:**  
Sunday: 11:00AM - 3:00PM  
Monday: 8:30AM - 7:30PM  
Tuesday: 8:30AM - 7:30PM  
Wednesday: 8:30AM - 7:30PM  
Thursday: 8:30AM - 7:30PM  
Friday: 8:30AM - 4:00PM  
Saturday: 9:00AM - 3:00PM

Please contact the organization to verify current hours of operation.

[Visit Website](#)

[Directions](#)

[Notify Us of Information Update](#)
