# Supplementary material for: Developing a Web-Based Geolocated Directory of HIV Pre-Exposure Prophylaxis-Providing Clinics: The PrEP Locator Protocol and Operating Procedures
Source: PubMed Central journal article supplement (PMC5607436; doi:10.2196/publichealth.7902), 2017-09-06

## Multimedia Appendix 4: Mobile widget interface screenshots

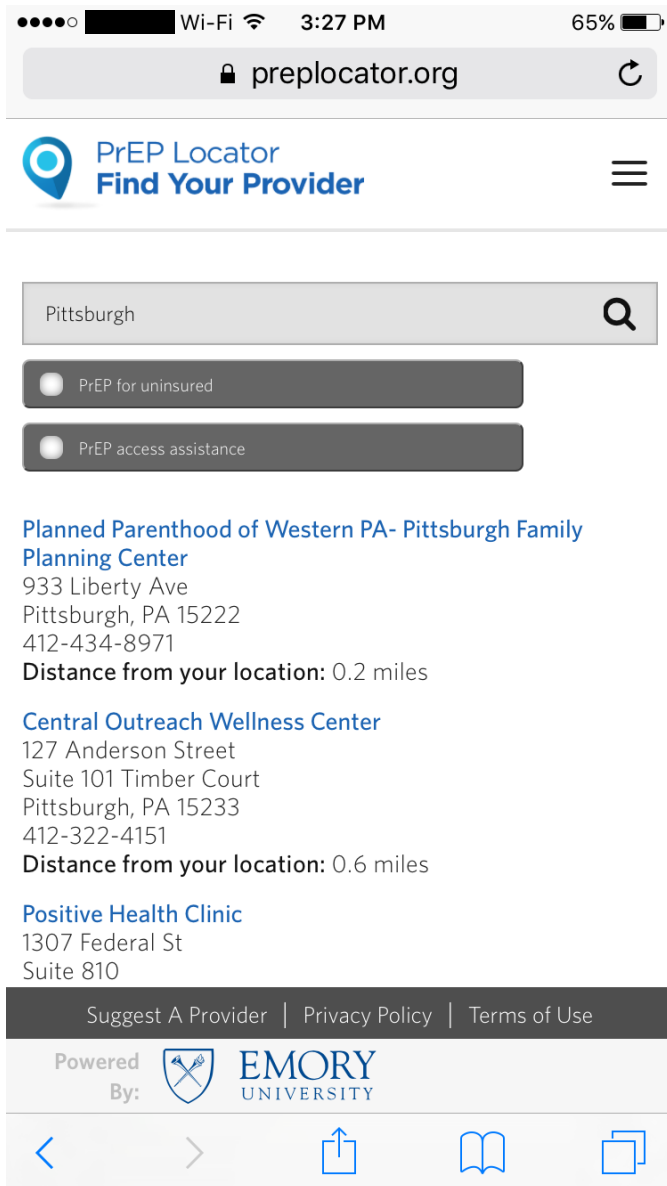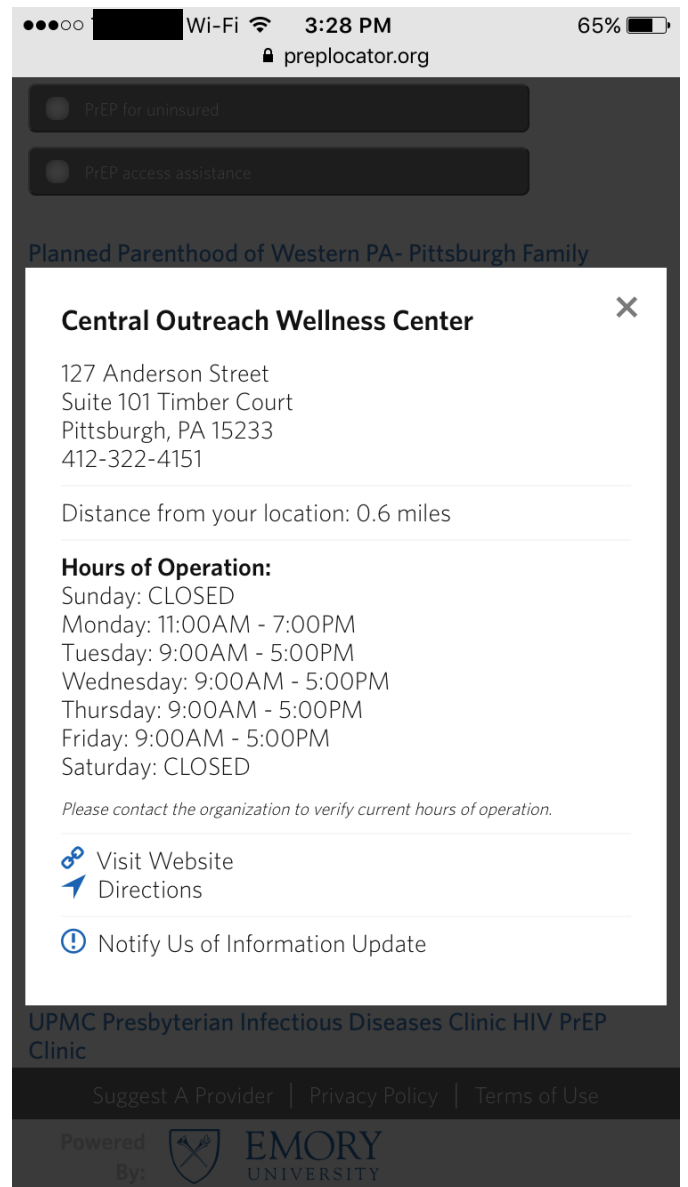

Supplement: publichealth_v3i3e58_app4.pdf [file publichealth_v3i3e58_app4.pdf]
